# Supplementary material for: Predictability of the impact of multiple stressors on the keystone species Daphnia
Source: PubMed Central journal article supplement (PMC6279757; doi:10.1038/s41598-018-35861-y), 2018-12-04

## **Predictability of the impact of multiple stressors on the keystone species *Daphnia***

Maria Cuenca Cambronero<sup>1</sup>, Hollie Marshall<sup>1</sup>, Luc De Meester<sup>2</sup>, Thomas Alexander Davidson<sup>3</sup>, Andrew P. Beckerman<sup>4#</sup> and Luisa Orsini<sup>1\*#</sup>

<sup>1</sup> Environmental Genomics Group, School of Biosciences, the University of Birmingham, Birmingham B15 2TT, UK

<sup>2</sup> Laboratory of Aquatic Ecology, Evolution and Conservation, University of Leuven, Ch. Deberiotstraat 32, 3000 Leuven, Belgium.

<sup>3</sup> Lake Group, Department of Bioscience, Aarhus University, Vejlshøjvej 25, P.O. Box 314, DK-8600 Silkeborg, Denmark

<sup>4</sup>Department of Animal and Plant Sciences, University of Sheffield, Sheffield S10 2TN, U.K

#these authors contributed equally

**Running head:** Predictability of multiple stressors

### **Corresponding author:**

Dr Luisa Orsini

Environmental Genomics Group, School of Biosciences, University of Birmingham, Birmingham B15 2TT, UK

Email: l.orsini@bham.ac.uk

**Table S1. Environmental metadata**

Paleolimnological and historical data are shown for the sedimentary archive of Lake Ring. For each radiometrically dated year, *Daphnia magna* ephippia count, Cladocera assemblage, carbamate insecticides, Loss on Ignition (LOI), transparency measured as Secchi disk depth, total Nitrates (TN) and total Phosphates (TP) are shown. Na = missing data. Data for transparency, TN and TP are available between 1971 and 1999.

| Year | <i>D. magna</i><br>ephippia | Cladocera<br>assemblage | Carbaryl<br>(T/year) | LOI  | Average<br>summer T (°C) | Secchi<br>disk depth | TN  | TP  |
|------|-----------------------------|-------------------------|----------------------|------|--------------------------|----------------------|-----|-----|
| 2004 | 58                          | -                       | 0.0                  | 25.0 | 16.8                     | -                    | -   | -   |
| 1999 | 94                          | 0.2                     | 5.9                  | 26.7 | 16.2                     | 2.5                  | 0.8 | 0.1 |
| 1994 | 55                          | 0.5                     | 147.9                | 29.9 | 16.3                     | 2.9                  | 0.9 | 0.3 |
| 1987 | 28                          | 0.4                     | 104.7                | 31.2 | 15.6                     | 2.1                  | 1.7 | 0.7 |
| 1984 | 94                          | 1.0                     | 143.0                | 30.6 | 15.6                     | 0.7                  | -   | -   |
| 1977 | 16                          | 0.4                     | 28.9                 | 33.4 | 15.5                     | 0.9                  | 1.7 | 1.8 |
| 1975 | 17                          | 0.3                     | 31.7                 | -    | 16.2                     | 0.5                  | 3.4 | 1.0 |
| 1971 | 19                          | 0.5                     | 14.5                 | 33.3 | 16.3                     | 0.7                  | 1.7 | 1.3 |
| 1968 | 11                          | 0.3                     | 18.9                 | -    | 15.0                     | -                    | -   | -   |
| 1964 | 7                           | -0.1                    | 1.4                  | 34.7 | 15.9                     | -                    | -   | -   |
| 1959 | 13                          | -0.1                    | 0.0                  | 29.4 | 16.2                     | -                    | -   | -   |
| 1942 | 31                          | -0.4                    | 0.0                  | 25.5 | 16.1                     | -                    | -   | -   |
| 1931 | 22                          | -0.8                    | 0.0                  | -    | 14.9                     | -                    | -   | -   |
| 1925 | 22                          | -0.9                    | 0.0                  | 28.1 | 15.4                     | -                    | -   | -   |
| 1918 | 3                           | -0.8                    | 0.0                  | 32.4 | 15.4                     | -                    | -   | -   |
| 1908 | 2                           | -0.4                    | 0.0                  | 29.4 | 15.2                     | -                    | -   | -   |
| 1900 | 1                           | 0.1                     | 0.0                  | -    | 16.2                     | -                    | -   | -   |
| 1896 | 1                           | 0.0                     | 0.0                  | 30.6 | 15.3                     | -                    | -   | -   |

**Table S2. Insecticides sold in Denmark**

List of insecticides sold in Denmark according to the Danish county authority between 1955 and 2010 ([www.middeldatabasen.dk](http://www.middeldatabasen.dk)). The total amount of each insecticide is show in tons. Yellow lines highlight carbamate insecticides, of which the commercial brand Carbaryl was used in this study.

|    | Pesticide                                                          | Tons    |
|----|--------------------------------------------------------------------|---------|
| 1  | parathion                                                          | 5272232 |
| 2  | DNOC                                                               | 2115794 |
| 3  | <b>TOTAL CARBAMATES</b>                                            | 1660104 |
| 4  | dimethoat                                                          | 1538096 |
| 5  | maleinhydrazid                                                     | 1420773 |
| 6  | methylbromid                                                       | 1098882 |
| 7  | cyanazin                                                           | 850392  |
| 8  | cupricarbonat-basisk                                               | 804526  |
| 9  | pirimicarb                                                         | 785775  |
| 10 | mechlorprop-P                                                      | 630959  |
| 11 | malathion                                                          | 587854  |
| 12 | DDT                                                                | 529960  |
| 13 | allylalkohol                                                       | 435780  |
| 14 | carbamat, natrium-N-dimethyldithio                                 | 400275  |
| 15 | cuprinaphthenat                                                    | 350009  |
| 16 | oxydemethon-methyl                                                 | 320645  |
| 17 | 1,3-dichlorpropylen                                                | 306745  |
| 18 | alloydim-natrium                                                   | 278147  |
| 19 | 2-bromo-2-nitropropan-1,3-diol                                     | 264741  |
| 20 | monuron                                                            | 207448  |
| 21 | cypermethrin                                                       | 198484  |
| 22 | aluminiumphosphid                                                  | 185896  |
| 23 | fenitrothion                                                       | 184380  |
| 24 | carbofuran                                                         | 174889  |
| 25 | chlорpicrin                                                        | 174876  |
| 26 | imidacloprid                                                       | 152108  |
| 27 | 4,5,2',4',6'-pentachlor-2-(chlormethylsulfonamid)-diphenylether-Na | 149035  |
| 28 | 1,2-dichlorpropan                                                  | 141230  |
| 29 | methoxychlor                                                       | 123448  |
| 30 | formothion                                                         | 112545  |
| 31 | dinatrium-octaborat-tetrahydrat                                    | 110639  |
| 32 | permethrin                                                         | 99933   |
| 33 | endosulfan                                                         | 98880   |
| 34 | carbaryl                                                           | 96496   |
| 35 | 2,3,6-TBA                                                          | 91776   |
| 36 | isofenphos                                                         | 90386   |

|    |                                                     |       |
|----|-----------------------------------------------------|-------|
| 37 | tau-fluvalinat                                      | 89793 |
| 38 | furathiocarb                                        | 85299 |
| 39 | thiometon                                           | 84823 |
| 40 | diazinon                                            | 83406 |
| 41 | azinphos-methyl                                     | 81389 |
| 42 | kviksølv (bejdsemiddel)                             | 80741 |
| 43 | mercaptodimethur                                    | 63565 |
| 44 | dichlorvos                                          | 62899 |
| 45 | 3-iodo-2-propynylbutyl-carbamat                     | 58133 |
| 46 | dinatrium-octaborat-tetrahydrat(natriumborat)       | 57322 |
| 47 | parathion-methyl                                    | 54535 |
| 48 | phosphamidon                                        | 54024 |
| 49 | pyrethrin-logII                                     | 54023 |
| 50 | fenvalerat                                          | 51546 |
| 51 | esfenvalerat                                        | 39646 |
| 52 | trichlorfon                                         | 36733 |
| 53 | dicofol                                             | 35623 |
| 54 | phoxim                                              | 34775 |
| 55 | metaldehyd                                          | 32936 |
| 56 | cypermethrin, -alpha                                | 31871 |
| 57 | 2,3-dihydro-6-methyl-5-phenylcarbamoyl-1,4-oxathiin | 31489 |
| 58 | alpha-cypermethrin                                  | 30372 |
| 59 | dinatrium-tetraborat-decahydrat(natriumborat)       | 30301 |
| 60 | methoxyethylmercurisilikat                          | 29634 |
| 61 | thiourinstof                                        | 29256 |
| 62 | furmecyclox                                         | 28596 |
| 63 | aldicarb                                            | 27748 |
| 64 | cuprihexafluorsilikat                               | 26732 |
| 65 | chlordioxid                                         | 26353 |
| 66 | phosalon                                            | 25409 |
| 67 | dieldrin                                            | 25015 |
| 68 | chlorfenvinphos                                     | 24706 |
| 69 | ronnel                                              | 21358 |
| 70 | acephat                                             | 20962 |
| 71 | N,N-diethyl-m-toluamid                              | 20962 |
| 72 | mevinphos                                           | 19538 |
| 73 | lambda-cyhalothrin                                  | 17636 |
| 74 | 2,2-dibrom-2-cyanoacetamid                          | 16642 |
| 75 | diflubenzuron                                       | 16408 |
| 76 | chlorpyrifos                                        | 16263 |
| 77 | bromophos                                           | 15676 |
| 78 | deltamethrin                                        | 15396 |

|     |                                       |       |
|-----|---------------------------------------|-------|
| 79  | trichloronat                          | 15060 |
| 80  | cyromazin                             | 14788 |
| 81  | nicotin                               | 14466 |
| 82  | jodfenphos                            | 14357 |
| 83  | icaridin                              | 13750 |
| 84  | propoxur                              | 12957 |
| 85  | thallium(I)sulfat                     | 12302 |
| 86  | d-trans-allethrin                     | 11786 |
| 87  | cuprihydroxicarbonat                  | 11418 |
| 88  | tetrasul                              | 11290 |
| 89  | dinatrium-octaborat(natriumborat)     | 11075 |
| 90  | tetradifon                            | 10871 |
| 91  | Amitraz                               | 10721 |
| 92  | hydroxy isobutyl piperidin carboxylat | 9718  |
| 93  | chlorfenson                           | 9073  |
| 94  | 2-(thiocyanomethylthio)-benzothiazol  | 8665  |
| 95  | azamethiphos                          | 8549  |
| 96  | dienochlor                            | 8396  |
| 97  | chlorsulfuron                         | 7577  |
| 98  | dibrom                                | 7506  |
| 99  | rotenon                               | 7395  |
| 100 | cyhexatin                             | 7114  |
| 101 | sulfotep                              | 7082  |
| 102 | oxamyl                                | 6317  |
| 103 | methomyl                              | 5816  |
| 104 | etrimphos                             | 5558  |
| 105 | methidathion                          | 5236  |
| 106 | betacyfluthrin                        | 4807  |
| 107 | chlorphenamidin                       | 4799  |
| 108 | cuprioctanoat                         | 4711  |
| 109 | 2,4-dinitrophenol                     | 4389  |
| 110 | dimethylphthalat                      | 4070  |
| 111 | ethiofencarb                          | 3985  |
| 112 | tetrachlorvinphos                     | 3829  |
| 113 | thiamethoxam                          | 3748  |
| 114 | hjordetakolie                         | 3642  |
| 115 | bioresmethrin                         | 3608  |
| 116 | citronellol                           | 3518  |
| 117 | phosmet                               | 3390  |
| 118 | p-menthan-3,8-diol                    | 3069  |
| 119 | thiophanox                            | 2951  |
| 120 | tecnazen                              | 2902  |

|     |                              |      |
|-----|------------------------------|------|
| 121 | fenbutatin-oxid              | 2719 |
| 122 | amidosulfuron                | 2698 |
| 123 | warfarin                     | 2305 |
| 124 | 2-methyl-4-isothiazolin-3-on | 2203 |
| 125 | propargit                    | 2148 |
| 126 | clofentezin                  | 1869 |
| 127 | tefluthrin                   | 1768 |
| 128 | chloralose (alpha)           | 1553 |
| 129 | fenpropathrin                | 1488 |
| 130 | 2-ethylhexan-1,3-diol        | 1274 |
| 131 | propetamphos                 | 1188 |
| 132 | fenazaquin                   | 924  |
| 133 | calciumpolysulfid            | 922  |
| 134 | methopren                    | 691  |
| 135 | spinosad                     | 616  |
| 136 | indoxacarb                   | 180  |

**Table S3. Genotypes used in the experiments.**

Individual ID, population ID and age are shown for the genotypes used in the experiments. All genotypes were used in the common garden experiments. The genotypes with an asterisk (\*) were used in the competition experiment. The multilocus microsatellite profile for the genotypes is available at <https://doi.org/10.5061/dryad.5k6t6>.

| Individual ID | Population ID | age       |
|---------------|---------------|-----------|
| LRV 0_1*      | CWP           | >1999     |
| LRV 0.5_3     | CWP           | >1999     |
| LRV 2_1*      | CWP           | >1999     |
| LRV 2.5_9*    | CWP           | >1999     |
| LRV 2.5_11*   | CWP           | >1999     |
| LRV 3_4       | CWP           | >1999     |
| LRV 3.5_1*    | CWP           | >1999     |
| LRV 3.5_2     | CWP           | >1999     |
| LRV 3.5_15*   | CWP           | >1999     |
| LRV 3_6       | CWP           | >1999     |
| LRV 6_2*      | PP            | 1980-1990 |
| LRV 6_3       | PP            | 1980-1990 |
| LRV 6.5_5     | PP            | 1980-1990 |
| LRV 6.5_7     | PP            | 1980-1990 |
| LRV 7_3       | PP            | 1980-1990 |
| LRV 7_5       | PP            | 1980-1990 |
| LRV 7.5_4*    | PP            | 1980-1990 |
| LRV 8.5_3*    | PP            | 1980-1990 |
| LRV 8_7       | PP            | 1980-1990 |
| LRV 9.5_1*    | PP            | 1980-1990 |
| LRV 9.5_3*    | PP            | 1980-1990 |
| LRV 9_6*      | PP            | 1980-1990 |
| LRV 9_20*     | PP            | 1980-1990 |
| LRV 12_2      | EP            | 1960-1970 |
| LRV 12_3*     | EP            | 1960-1970 |
| LRV 12_4      | EP            | 1960-1970 |
| LRV 12.5_1    | EP            | 1960-1970 |
| LRV 13_1*     | EP            | 1960-1970 |
| LRV 13_2*     | EP            | 1960-1970 |
| LRV 13_3*     | EP            | 1960-1970 |
| LRV 13.5_1*   | EP            | 1960-1970 |
| LRV 14.5_1*   | EP            | 1960-1970 |
| LRV 15.5_1*   | EP            | 1960-1970 |

**Figure S1. *Daphnia magna* hatching success**

Percentage of *D. magna* dormant embryos that successfully hatched in the laboratory across the sedimentary archive. This figure is modified from Cambronero and Orsini (2018).

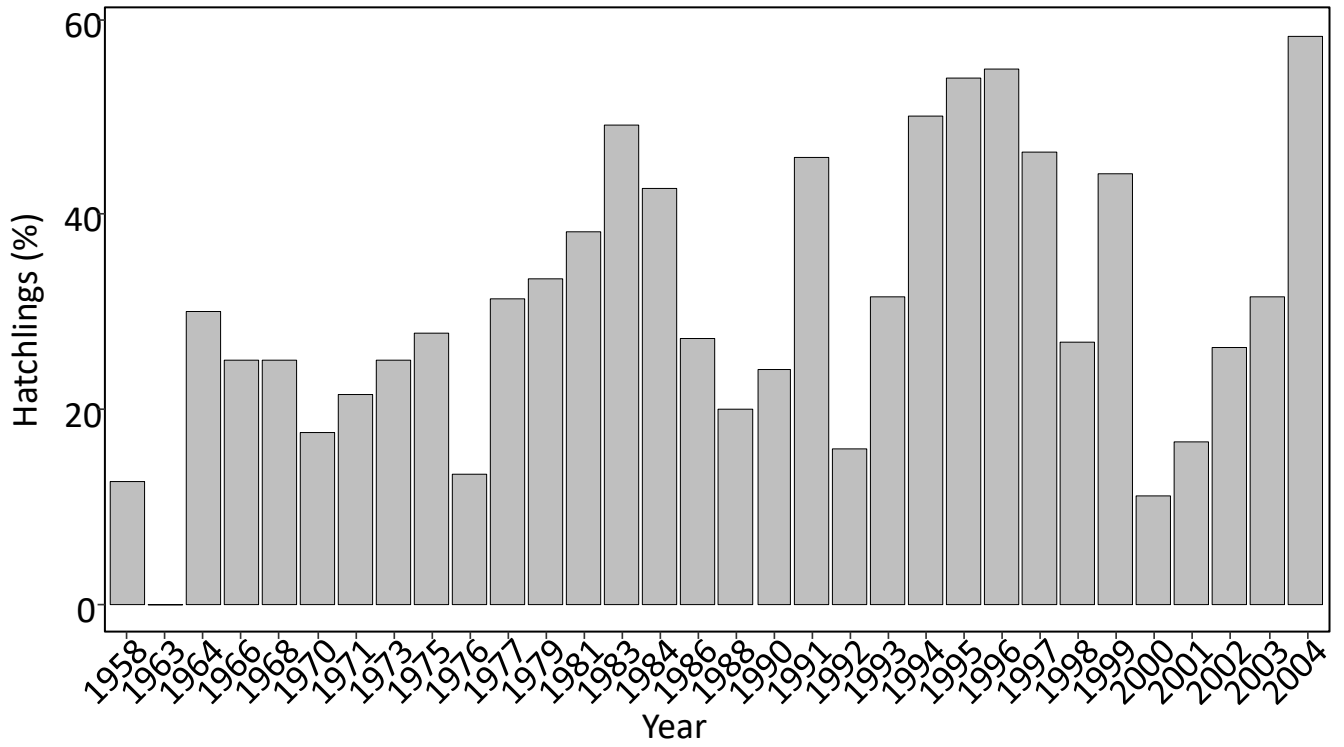



## Figure S2. Mortality

Mortality per population and experiment: CGE1 (Temperature), CGE2 (Temperature and Food) and CGE3 (Temperature and Carbaryl) measured over 21 days. For CGE2 high (continuous lines) and low (dotted lines) concentrations of food are shown. For CGE3 high (continuous lines) and low (dotted lines) concentrations of Carbaryl are shown. The concentrations are as in Figure 1. Mortality was calculated with survival analysis in R using the rms package (<https://cran.r-project.org/web/packages/rms/rms.pdf>).

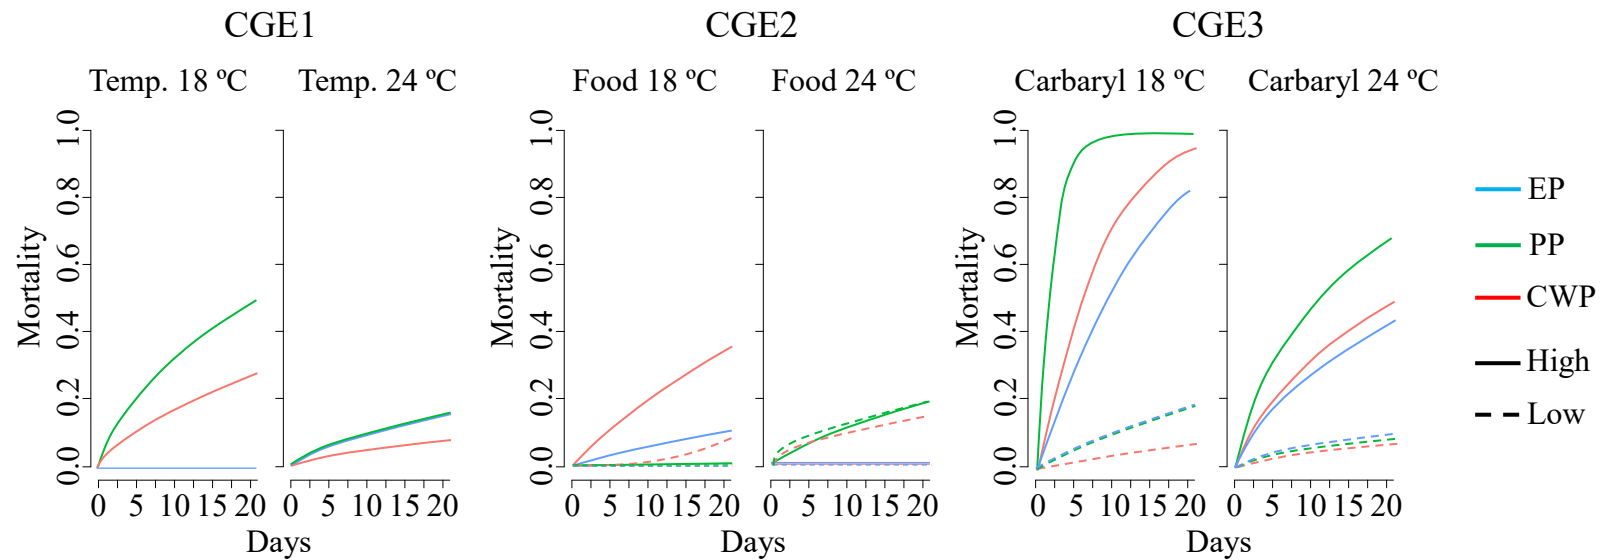

Supplement: 41598_2018_35861_MOESM1_ESM.pdf [file 41598_2018_35861_MOESM1_ESM.pdf]
